# Supplementary material for: Modeling the function of BAX and BAK in early human brain development using iPSC-derived systems
Source: PubMed Central journal article supplement (PMC7519160; doi:10.1038/s41419-020-03002-x), 2020-09-25

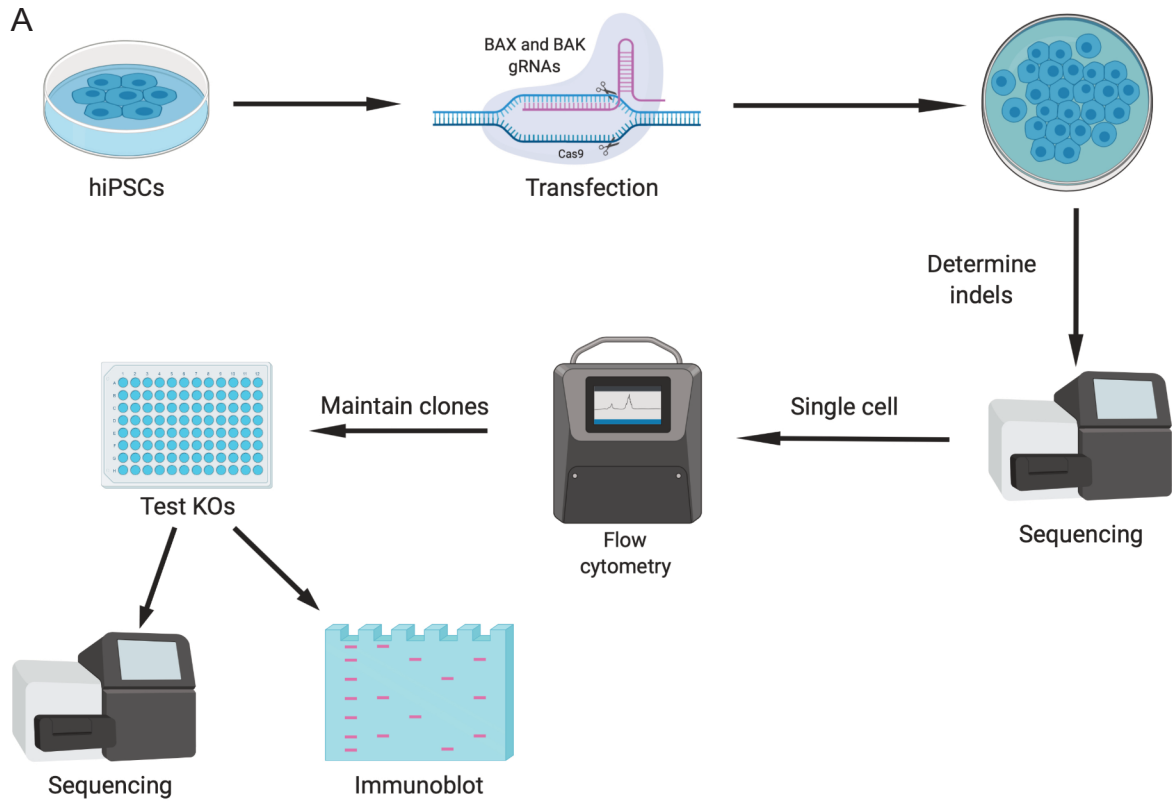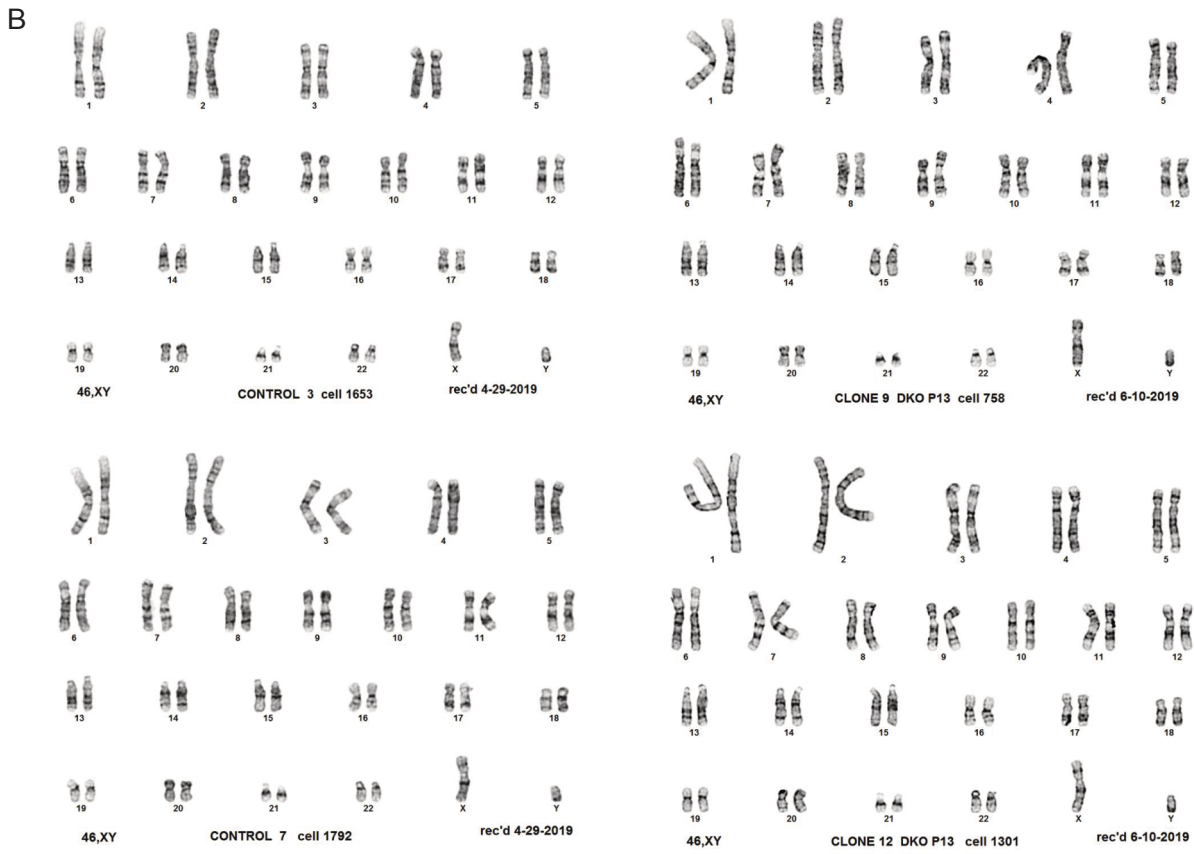

Supplement: 41419_2020_3002_MOESM1_ESM.pdf [file 41419_2020_3002_MOESM1_ESM.pdf]
